# Supplementary material for: Virtual Screening-Based Study of Novel Anti-Cancer Drugs Targeting G-Quadruplex
Source: MDPI journal article supplement (doi:10.3390/pharmaceutics15051414), 2023-05-05
Supplement: s1 [file s1]

## Supporting Information

Table S1. The physical properties and similarity score of 23 screened compounds

| Number | logP  | MW       | HBA | HBD | RC | PSA   | Polar  |
|--------|-------|----------|-----|-----|----|-------|--------|
| 1      | 0.32  | 365.4256 | 4   | 1   | 3  | 73.74 | 46.264 |
| 2      | 0.52  | 383.4161 | 4   | 1   | 3  | 73.74 | 46.173 |
| 3      | 2.16  | 432.8973 | 5   | 1   | 3  | 83.22 | 49.502 |
| 4      | 2.02  | 402.4823 | 3   | 1   | 3  | 89.09 | 47.695 |
| 5      | -0.03 | 425.4776 | 6   | 1   | 3  | 92.2  | 51.208 |
| 6      | 2.41  | 414.4451 | 3   | 1   | 3  | 60.85 | 49.17  |
| 7      | 1.16  | 424.4895 | 5   | 1   | 3  | 79.31 | 52.461 |
| 8      | 1.67  | 384.856  | 3   | 1   | 3  | 60.85 | 47.652 |
| 9      | 1.81  | 371.3806 | 2   | 0   | 4  | 43.86 | 43.797 |
| 10     | 2.04  | 316.3948 | 3   | 0   | 3  | 49.85 | 37.681 |
| 11     | 2.62  | 425.5222 | 2   | 0   | 5  | 43.86 | 58.738 |
| 12     | 3.18  | 348.4382 | 2   | 0   | 4  | 40.62 | 46.298 |
| 13     | 1.89  | 358.7757 | 4   | 0   | 4  | 67.87 | 42.202 |
| 14     | 0.97  | 432.1071 | 3   | 1   | 3  | 60.85 | 37.428 |
| 15     | 2.36  | 351.2383 | 2   | 0   | 3  | 40.62 | 36     |
| 16     | 1.47  | 328.3376 | 3   | 0   | 3  | 58.64 | 40.278 |
| 17     | 1.06  | 379.4522 | 3   | 0   | 4  | 53.09 | 48.286 |
| 18     | -0.66 | 317.3828 | 3   | 0   | 3  | 61.88 | 37.197 |
| 19     | 2.2   | 326.3648 | 2   | 0   | 3  | 49.41 | 41.476 |
| 20     | 2.02  | 286.3688 | 2   | 0   | 3  | 40.62 | 35.209 |
| 21     | 2.23  | 356.3907 | 3   | 0   | 3  | 58.64 | 43.948 |
| 22     | 0.51  | 392.451  | 3   | 1   | 4  | 72.96 | 49.086 |
| 23     | 1.22  | 368.4014 | 3   | 1   | 3  | 60.85 | 45.591 |

logP: oil-water partition coefficient.

MW: molecular weight.

HBA: hydrogen bonded acceptor.

HBD: hydrogen bonded donor.

RC: relative crystallinity

PSA: polar surface area

**Table S2.** Docking scores of 23 hit compounds.

| Number | Docking Score |          |          |          |
|--------|---------------|----------|----------|----------|
|        | 143D          | 1KF1     | 2HY9     | 2JPZ     |
| 1      | -6.36921      | -3.30817 | -5.4937  | -3.87285 |
| 2      | -5.30124      | -3.06062 | -4.59782 | -3.74024 |
| 3      | -4.37155      | -3.14798 | -4.90768 | -4.53299 |
| 4      | -5.8222       | -2.61149 | -4.86061 | -4.02361 |
| 5      | -4.82827      | -3.41171 | -5.08112 | -4.50055 |
| 6      | -5.01954      | -2.71853 | -5.00908 | -4.88085 |
| 7      | -5.01123      | -3.61745 | -4.81507 | -4.20793 |
| 8      | -4.9374       | -2.95308 | -5.01893 | -5.65552 |
| 9      | -4.08517      | -5.7094  | -5.34572 | -6.78632 |
| 10     | -5.10363      | -6.11016 | -6.20308 | -5.03704 |
| 11     | -5.39837      | -4.33044 | -5.55276 | -4.28201 |
| 12     | -5.45704      | -4.75493 | -4.22932 | -6.91298 |
| 13     | -6.4635       | -6.66536 | -6.12421 | -5.48711 |
| 14     | -4.93495      | -5.62584 | -6.16354 | -5.45613 |
| 15     | -6.00265      | -5.94935 | -5.92312 | -5.72202 |
| 16     | -6.96146      | -6.54753 | -6.49837 | -4.79471 |
| 17     | -5.67672      | -5.86457 | -6.00714 | -6.33375 |
| 18     | -3.93663      | -3.83226 | -5.04324 | -4.83038 |
| 19     | -6.22413      | -5.06335 | -6.52012 | -4.70422 |
| 20     | -5.30844      | -6.15113 | -6.20905 | -6.28896 |
| 21     | -5.56251      | -6.66644 | -6.62432 | -4.64252 |
| 22     | -5.11953      | -5.30395 | -6.21182 | -6.2523  |
| 23     | -5.53678      | -2.95099 | -5.07523 | -5.88785 |

**Table S3.** 3D similarity calculation scores of 23 hit compounds.

| Number | Template | FeatureScore | ShapeScore | HybridScore |
|--------|----------|--------------|------------|-------------|
| 1      | 1        | 0.44         | 0.785      | 1.227       |
| 2      | 1        | 0.44         | 0.785      | 1.227       |
| 3      | 3        | 0.338        | 0.672      | 1.01        |
| 4      | 1        | 0.455        | 0.68       | 1.136       |
| 5      | 2        | 0.348        | 0.605      | 0.954       |
| 6      | 1        | 0.521        | 0.729      | 1.25        |
| 7      | 3        | 0.273        | 0.676      | 0.95        |
| 8      | 6        | 0.345        | 0.693      | 1.039       |
| 9      | 1        | 0.516        | 0.594      | 1.111       |
| 10     | 1        | 0.434        | 0.688      | 1.132       |
| 11     | 4        | 0.317        | 0.638      | 0.955       |
| 12     | 3        | 0.521        | 0.668      | 1.19        |
| 13     | 3        | 0.398        | 0.667      | 1.066       |
| 14     | 5        | 0.357        | 0.547      | 0.904       |
| 15     | 6        | 0.396        | 0.798      | 1.194       |
| 16     | 6        | 0.386        | 0.693      | 1.079       |
| 18     | 3        | 0.343        | 0.69       | 1.033       |
| 19     | 3        | 0.494        | 0.712      | 1.206       |
| 20     | 2        | 0.485        | 0.629      | 1.114       |
| 21     | 6        | 0.407        | 0.673      | 1.081       |
| 22     | 6        | 0.423        | 0.666      | 1.089       |
| 23     | 6        | 0.401        | 0.684      | 1.08        |

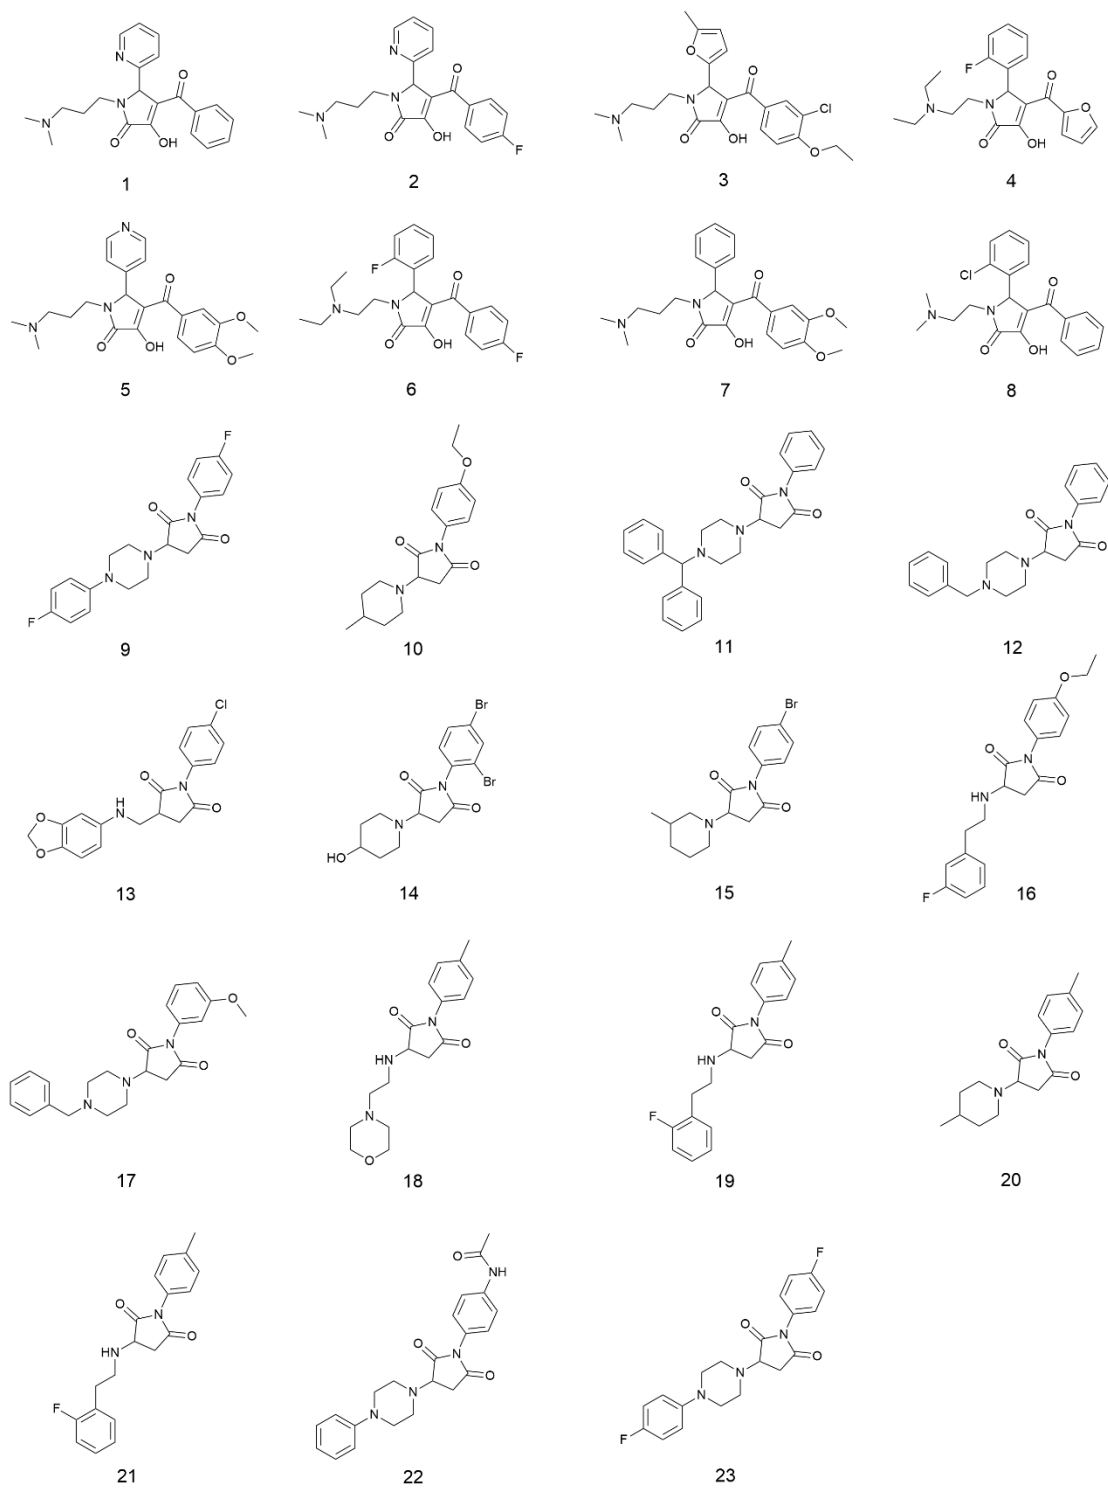

Figure S1. The chemical structures of 23 screened compounds.

Table S4. Names of 23 screened compounds

| No. | Chemical Formula                                                              | Compound name                                                                                                               |
|-----|-------------------------------------------------------------------------------|-----------------------------------------------------------------------------------------------------------------------------|
| 1   | C <sub>21</sub> H <sub>23</sub> N <sub>3</sub> O <sub>3</sub>                 | 4-benzoyl-1-[3-(dimethylamino)propyl]-3-hydroxy-5-(2-pyridinyl)-1,5-dihydro-2 <i>H</i> -pyrrol-2-one                        |
| 2   | C <sub>21</sub> H <sub>22</sub> FN <sub>3</sub> O <sub>3</sub>                | 1-[3-(dimethylamino)propyl]-4-(4-fluorobenzoyl)-3-hydroxy-5-(2-pyridinyl)-1,5-dihydro-2 <i>H</i> -pyrrol-2-one              |
| 3   | C <sub>23</sub> H <sub>27</sub> ClN <sub>2</sub> O <sub>5</sub>               | 4-(3-chloro-4-ethoxybenzoyl)-1-[2-(dimethylamino)ethyl]-3-hydroxy-5-(5-methyl-2-furyl)-1,5-dihydro-2 <i>H</i> -pyrrol-2-one |
| 4   | C <sub>21</sub> H <sub>23</sub> FN <sub>2</sub> O <sub>4</sub>                | 1-[2-(diethylamino)ethyl]-5-(2-fluorophenyl)-3-hydroxy-4-(2-thienylcarbonyl)-1,5-dihydro-2 <i>H</i> -pyrrol-2-one           |
| 5   | C <sub>23</sub> H <sub>27</sub> N <sub>3</sub> O <sub>5</sub>                 | 4-(3,4-dimethoxybenzoyl)-1-[3-(dimethylamino)propyl]-3-hydroxy-5-(4-pyridinyl)-1,5-dihydro-2 <i>H</i> -pyrrol-2-one         |
| 6   | C <sub>23</sub> H <sub>24</sub> F <sub>2</sub> N <sub>2</sub> O <sub>3</sub>  | 1-[2-(diethylamino)ethyl]-4-(4-fluorobenzoyl)-5-(2-fluorophenyl)-3-hydroxy-1,5-dihydro-2 <i>H</i> -pyrrol-2-one             |
| 7   | C <sub>24</sub> H <sub>28</sub> N <sub>2</sub> O <sub>5</sub>                 | 4-(3,4-dimethoxybenzoyl)-1-[3-(dimethylamino)propyl]-3-hydroxy-5-phenyl-1,5-dihydro-2 <i>H</i> -pyrrol-2-one                |
| 8   | C <sub>21</sub> H <sub>21</sub> ClN <sub>2</sub> O <sub>3</sub>               | 4-benzoyl-5-(2-chlorophenyl)-1-[2-(dimethylamino)ethyl]-3-hydroxy-1,5-dihydro-2 <i>H</i> -pyrrol-2-one                      |
| 9   | C <sub>20</sub> H <sub>19</sub> F <sub>2</sub> N <sub>3</sub> O <sub>2</sub>  | 1-(4-fluorophenyl)-3-[4-(4-fluorophenyl)-1-piperazinyl]-2,5-pyrrolidinedione                                                |
| 10  | C <sub>18</sub> H <sub>24</sub> N <sub>2</sub> O <sub>3</sub>                 | 1-(4-ethoxyphenyl)-3-(4-methyl-1-piperidinyl)-2,5-pyrrolidinedione                                                          |
| 11  | C <sub>27</sub> H <sub>27</sub> N <sub>3</sub> O <sub>2</sub>                 | 3-(4-benzhydryl-1-piperazinyl)-1-phenyl-2,5-pyrrolidinedione                                                                |
| 12  | C <sub>21</sub> H <sub>23</sub> N <sub>3</sub> O <sub>2</sub>                 | 3-(4-benzyl-1-piperidinyl)-1-phenyl-2,5-pyrrolidinedione                                                                    |
| 13  | C <sub>18</sub> H <sub>15</sub> ClN <sub>2</sub> O <sub>4</sub>               | 3-[(1,3-benzodioxol-5-ylmethyl)amino]-1-(4-chlorophenyl)-2,5-pyrrolidinedione                                               |
| 14  | C <sub>15</sub> H <sub>16</sub> Br <sub>2</sub> N <sub>2</sub> O <sub>3</sub> | 1-(2,4-dibromophenyl)-3-(4-hydroxy-1-piperidinyl)-2,5-pyrrolidinedione                                                      |
| 15  | C <sub>16</sub> H <sub>19</sub> BrN <sub>2</sub> O <sub>2</sub>               | 1-(4-bromophenyl)-3-(3-methyl-1-piperidinyl)-2,5-pyrrolidinedione                                                           |
| 16  | C <sub>20</sub> H <sub>21</sub> FN <sub>2</sub> O <sub>3</sub>                | 3-[(4-fluorobenzyl)amino]-1-(4-methoxyphenyl)-2,5-pyrrolidinedione                                                          |
| 17  | C <sub>22</sub> H <sub>25</sub> N <sub>3</sub> O <sub>3</sub>                 | 3-(4-benzyl-1-piperazinyl)-1-(3-methoxyphenyl)-2,5-pyrrolidinedione                                                         |
| 18  | C <sub>17</sub> H <sub>23</sub> N <sub>3</sub> O <sub>3</sub>                 | 1-(4-methylphenyl)-3-{[2-(4-morpholinyl)ethyl]amino}-2,5-pyrrolidinedione                                                   |
| 19  | C <sub>19</sub> H <sub>19</sub> FN <sub>2</sub> O <sub>2</sub>                | 3-{[2-(2-fluorophenyl)ethyl]amino}-1-(4-methylphenyl)-2,5-pyrrolidinedione                                                  |
| 20  | C <sub>17</sub> H <sub>22</sub> N <sub>2</sub> O <sub>2</sub>                 | 1-(4-methylphenyl)-3-(4-methyl-1-piperidinyl)-2,5-pyrrolidinedione                                                          |
| 21  | C <sub>19</sub> H <sub>19</sub> FN <sub>2</sub> O <sub>2</sub>                | 1-(4-ethoxyphenyl)-3-{[2-(3-fluorophenyl)ethyl]amino}-2,5-pyrrolidinedione                                                  |
| 22  | C <sub>22</sub> H <sub>24</sub> N <sub>4</sub> O <sub>3</sub>                 | N-{4-[2,5-dioxo-3-(4-phenyl-1-piperazinyl)-1-pyrrolidinyl]phenyl}acetamide                                                  |
| 23  | C <sub>20</sub> H <sub>19</sub> F <sub>2</sub> N <sub>3</sub> O <sub>2</sub>  | 1-(4-fluorophenyl)-3-(4-(4-fluorophenyl)piperazin-1-yl)pyrrolidine-2,5-dione                                                |

### Compound 1

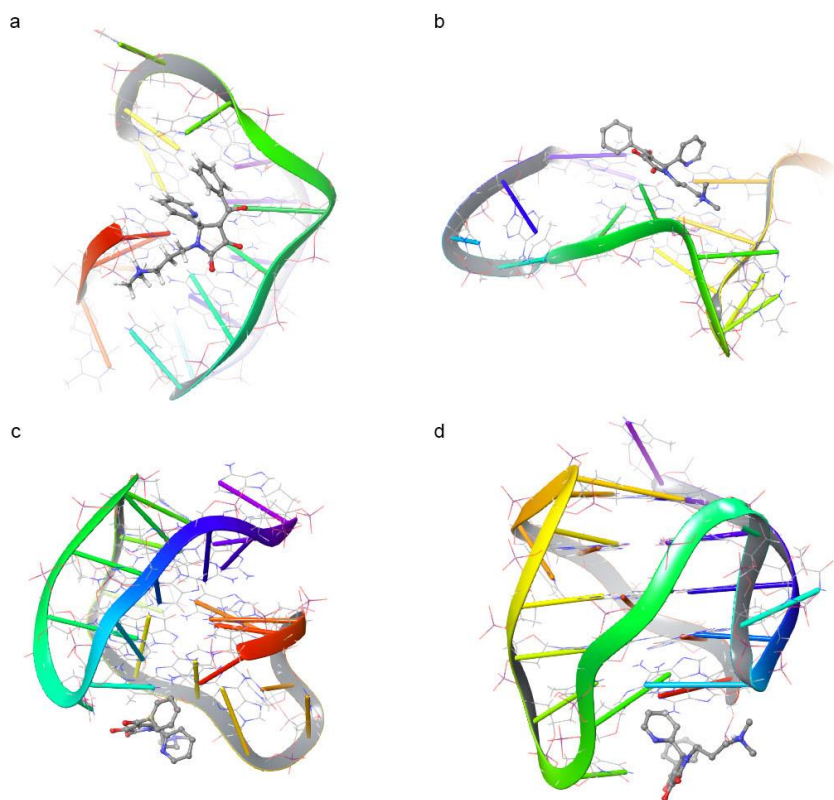

### Compound 2

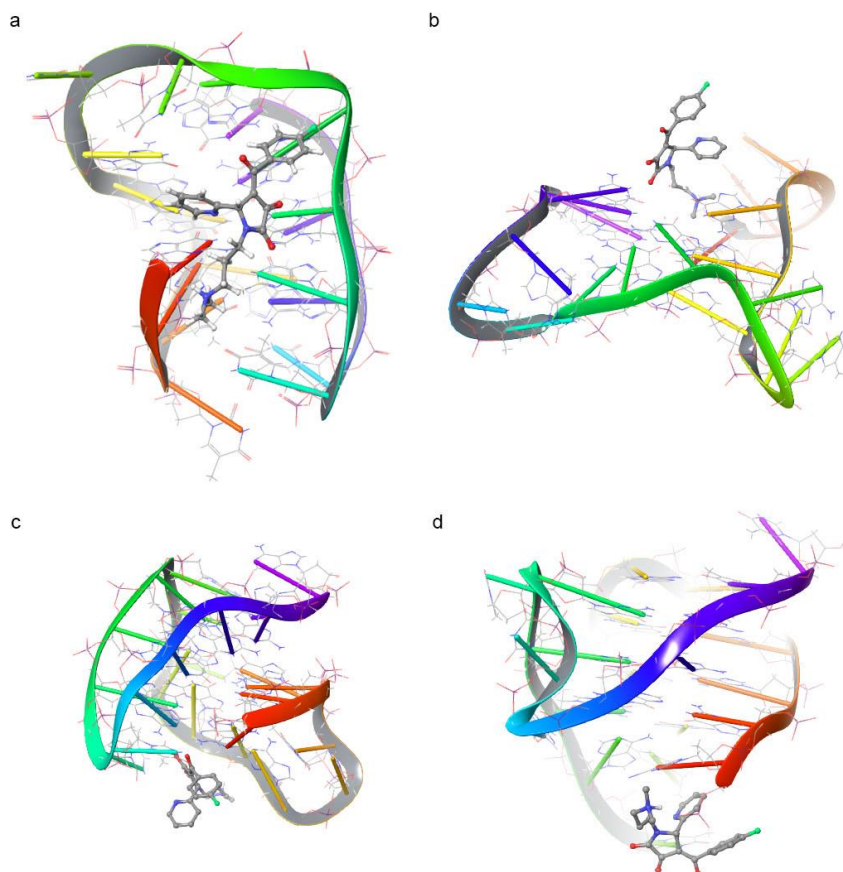

Compound 3

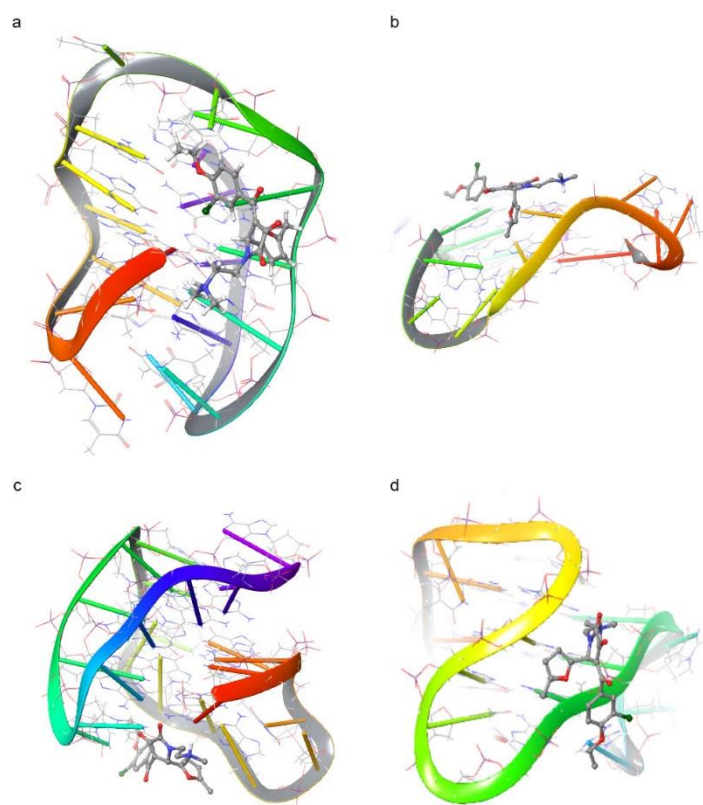

Compound 4

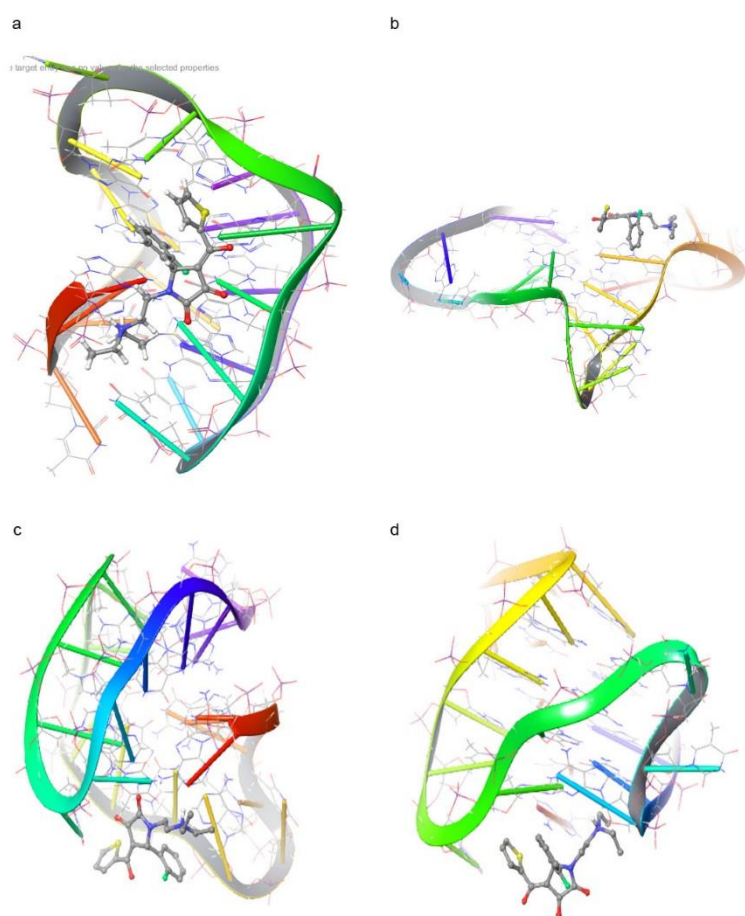

Compound 5

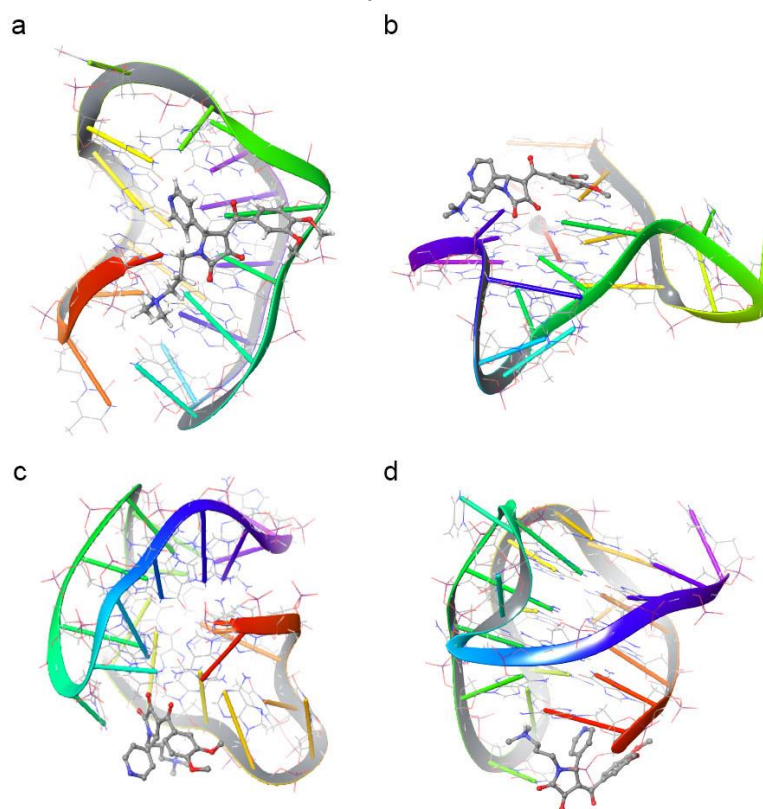

Compound 6

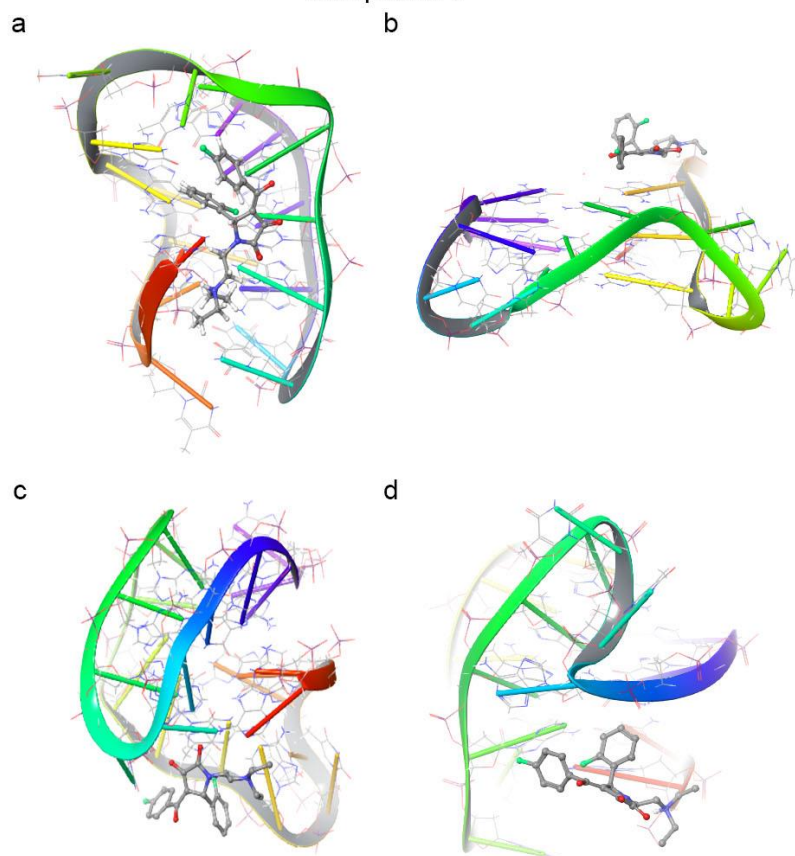



Compound 7

a

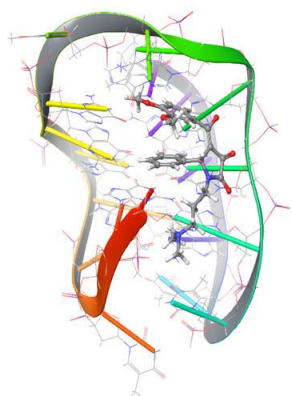

b

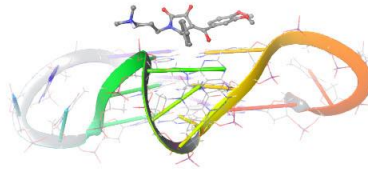

c

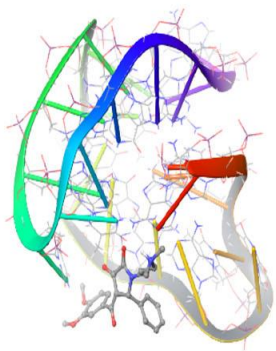

d

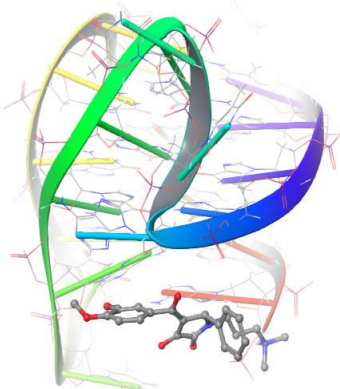

Compound 8

a

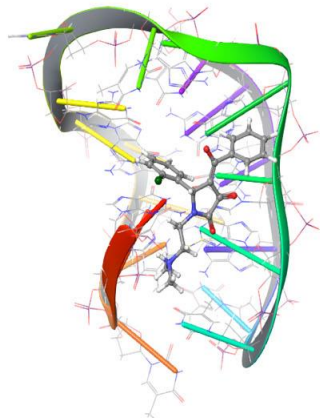

b

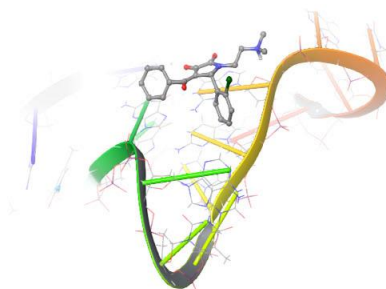

c

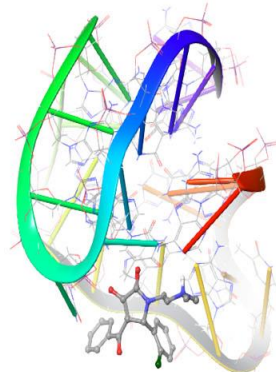

d

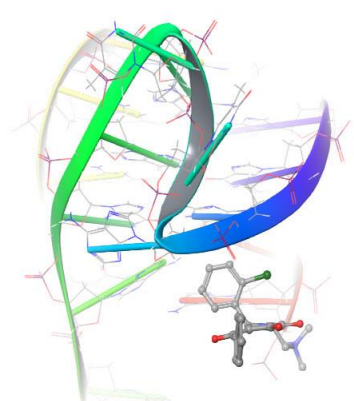



Compound 9

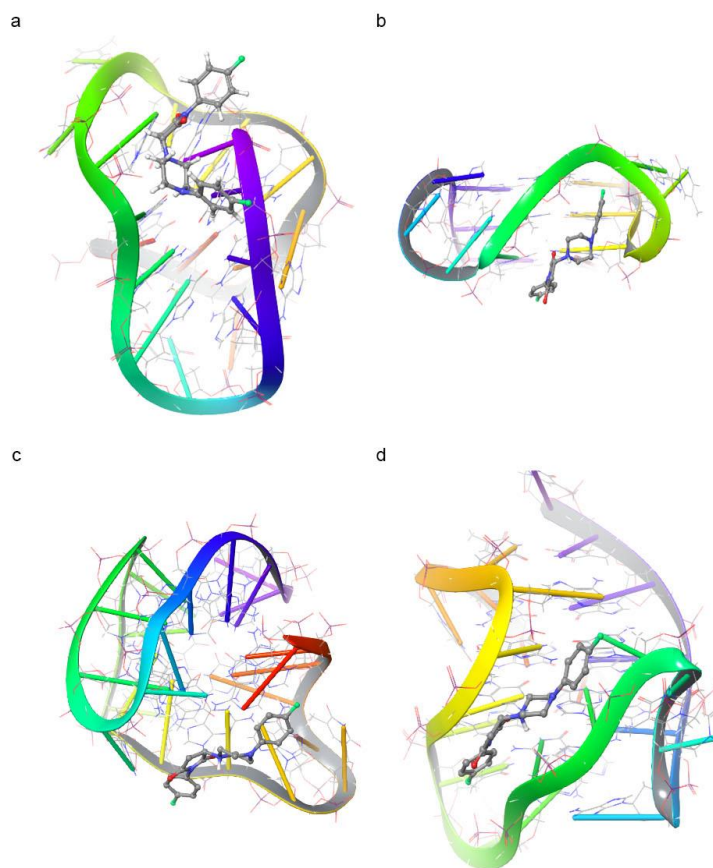

Compound 10

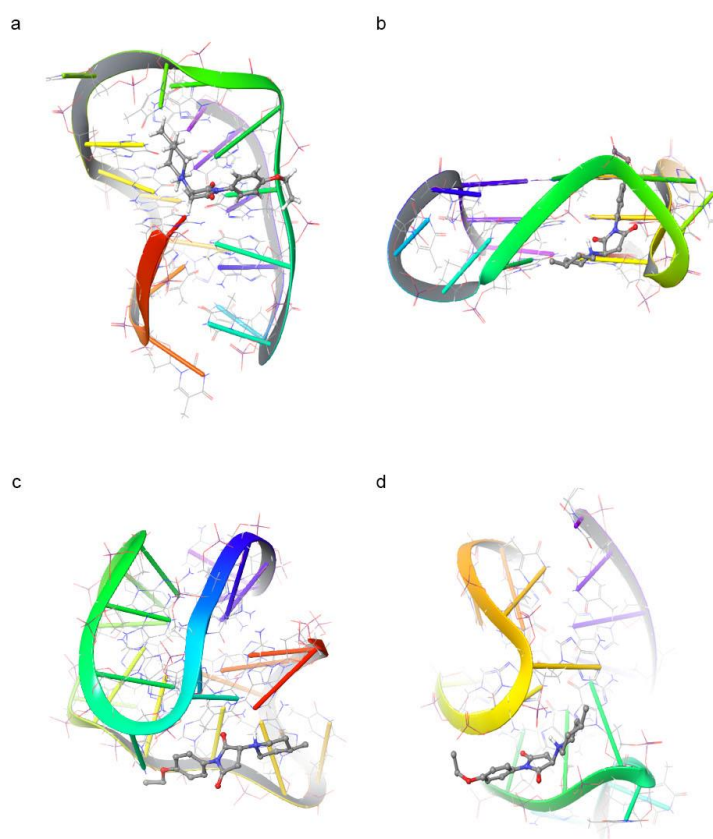

### Compound 11

a

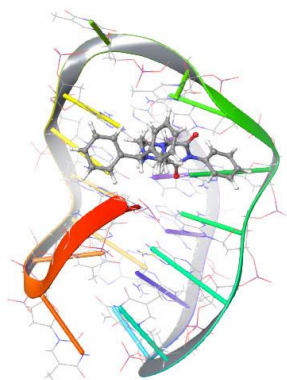

b

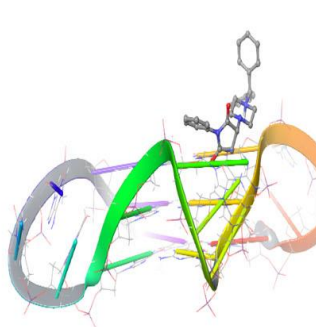

c

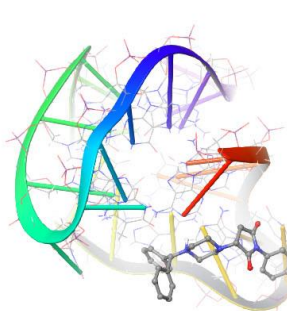

d

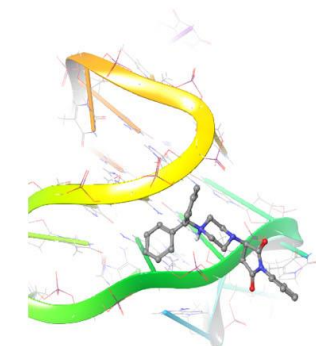

### Compound 12

a

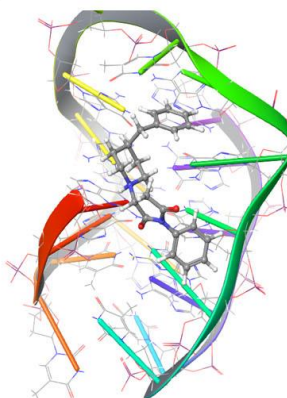

b

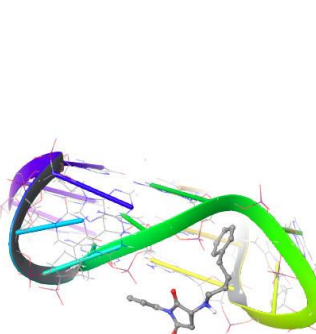

c

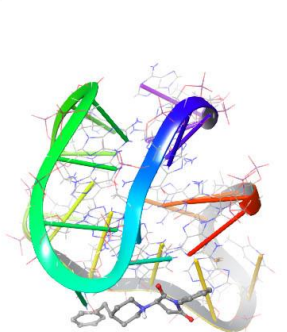

d

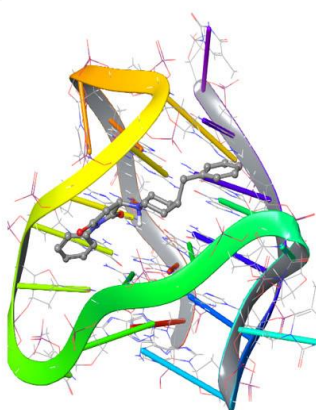

### Compound 13

a

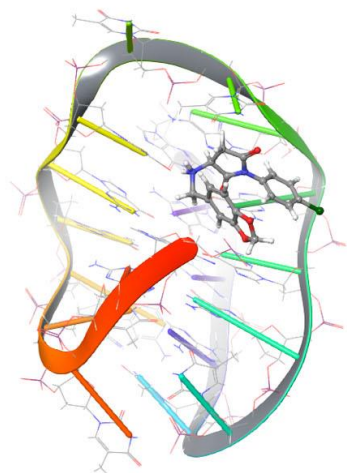

b

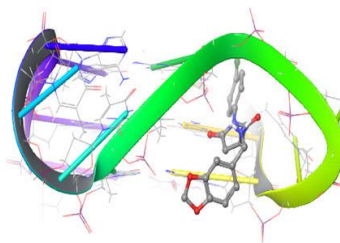

c

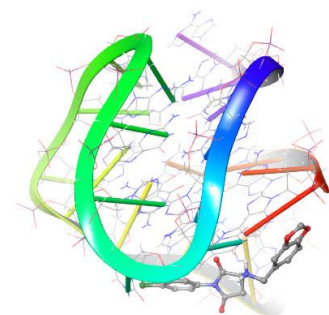

d

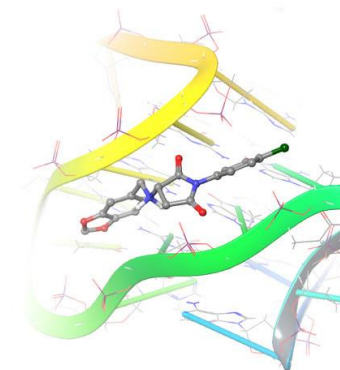

### Compound 14

a

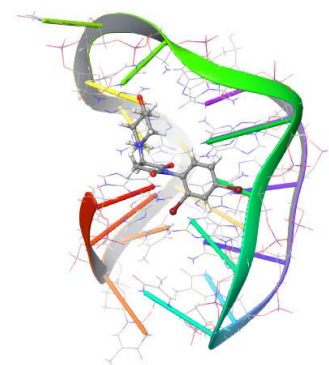

b

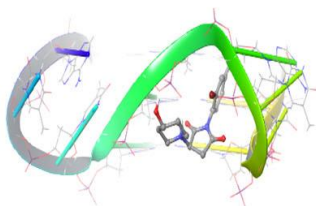

c

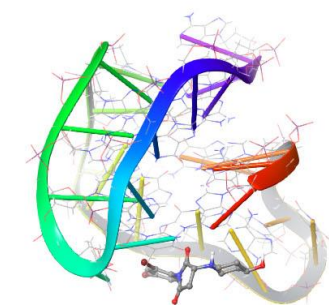

d

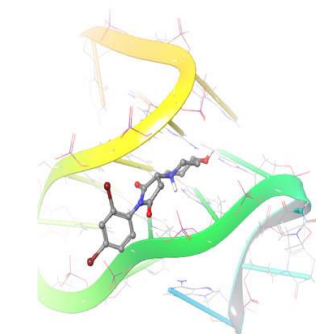

# Compound 15

a

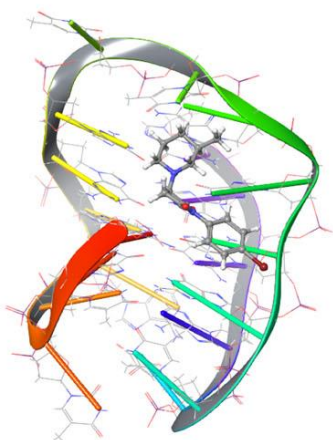

b

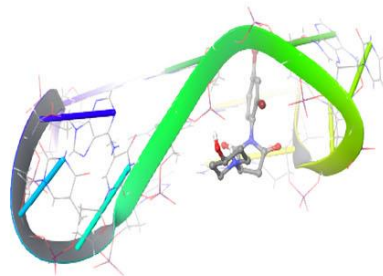

c

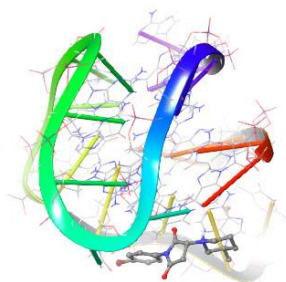

d

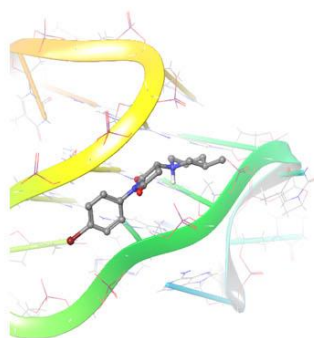

# Compound 16

a

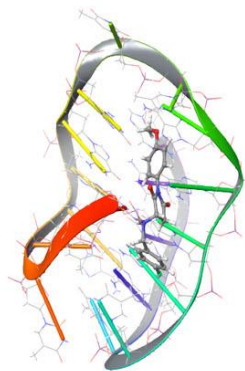

b

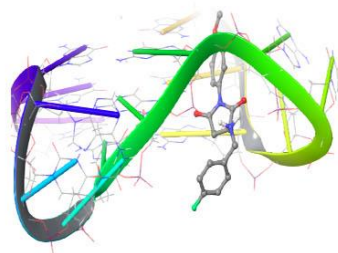

c

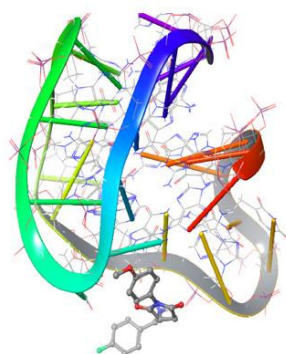

d

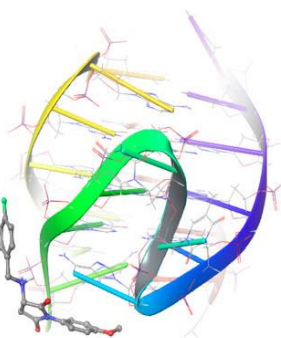



### Compound 17

a

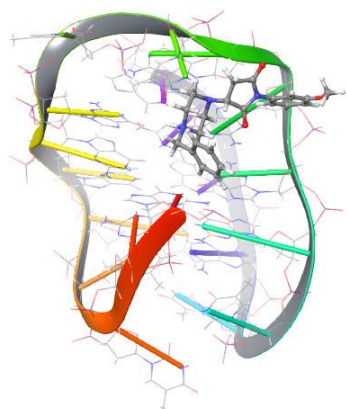

b

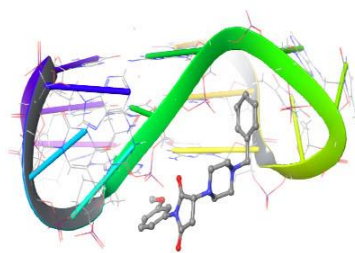

c

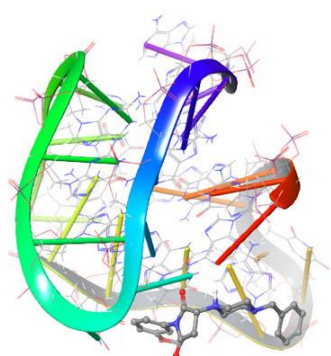

d

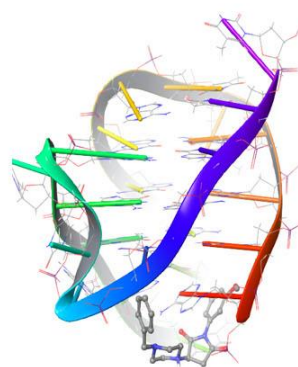

### Compound 18

a

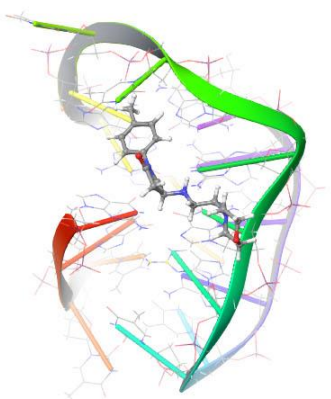

b

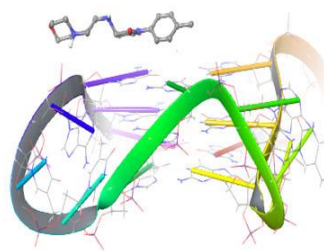

c

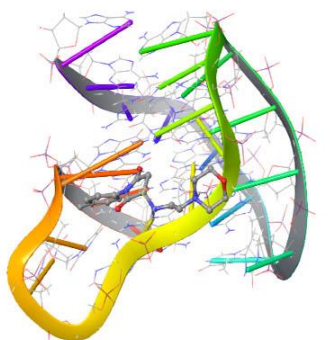

d

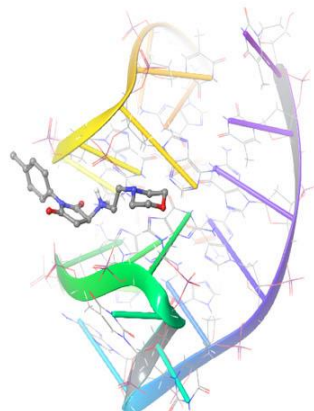

Compound 19

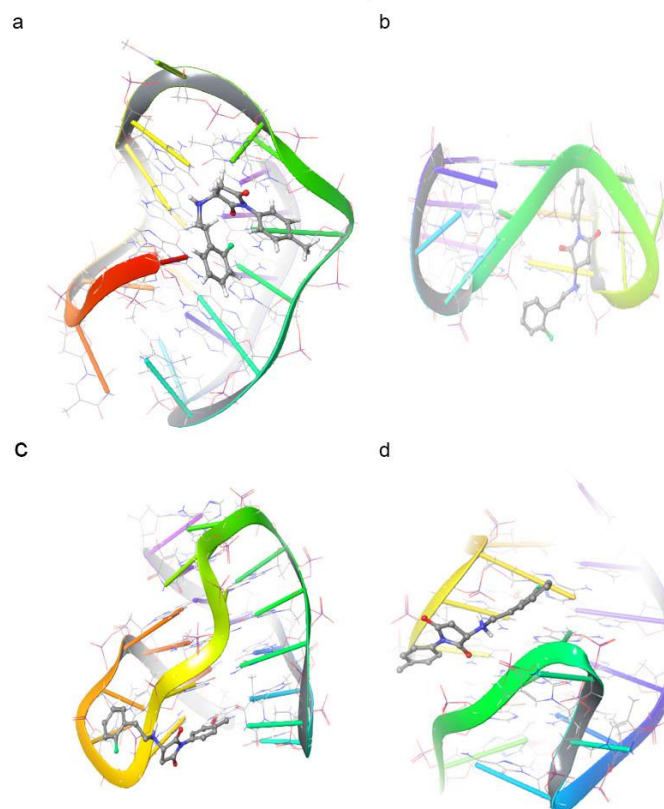

Compound 20

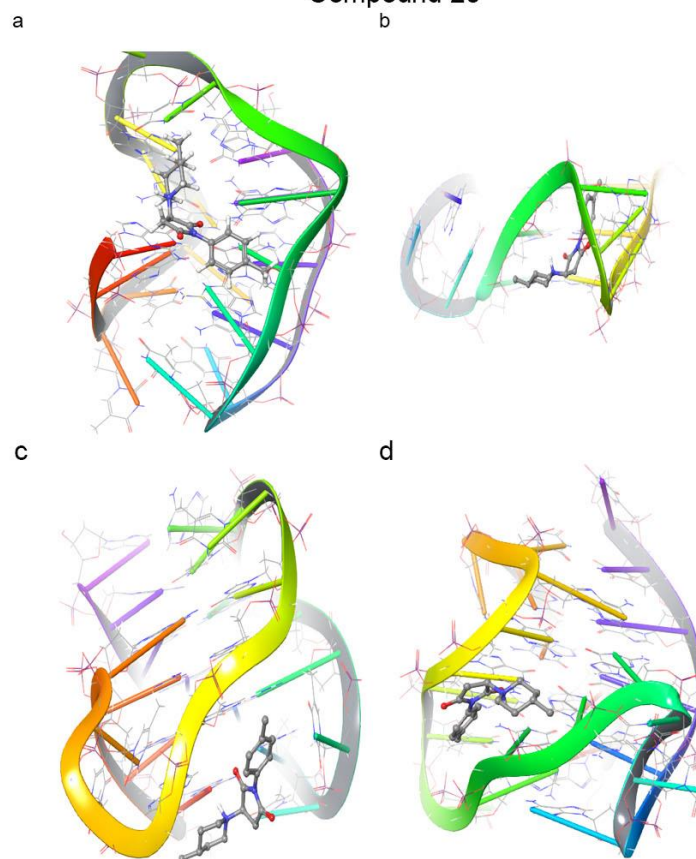



Compound 22

a

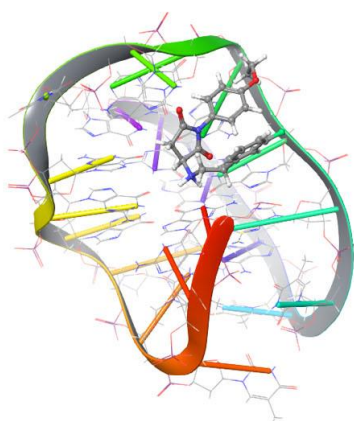

b

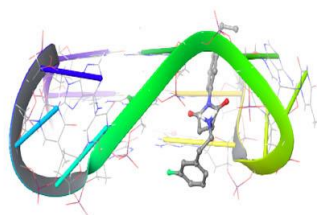

c

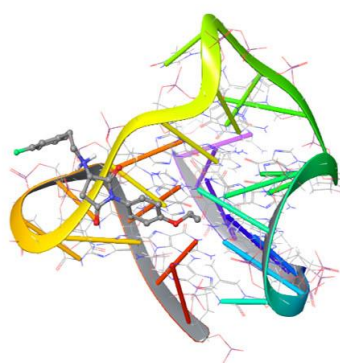

d

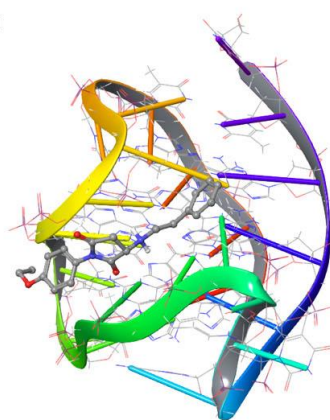

Compound 22

a

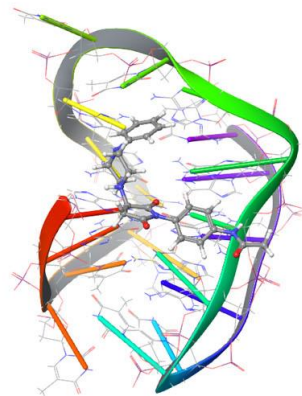

b

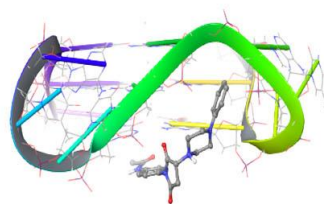

c

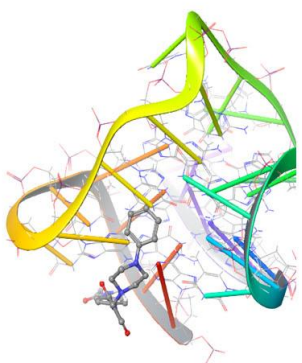

d

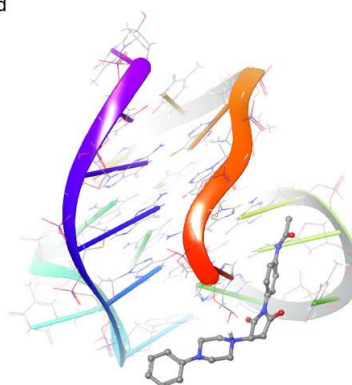

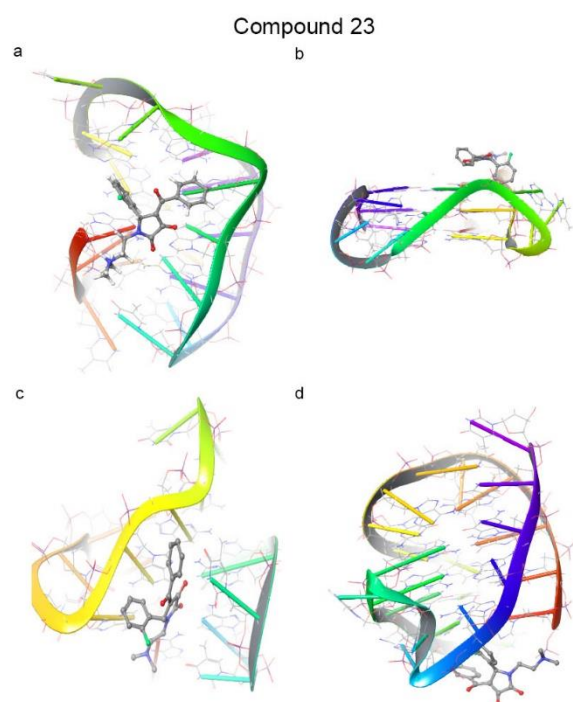

Figure S2. Four conformations of 23 screened compounds binding to G4 quadruplexes (a-b: 143D, 1KF1, 2HY9, 2JPZ) .
